# Supplementary material for: Effects of Diet and Lifestyle on Audio-Vestibular Dysfunction in the Elderly: A Literature Review
Source: MDPI journal article supplement (doi:10.3390/nu14224720), 2022-11-08
Supplement: s1 [file s1]

**Table S1. Newcastle-Ottawa Scale Quality Assessment of included Studies of the effects of diets on ARHL, ARVL and related components.**

|                     | Selection                                |                                     |                           |                                        | Comparability              |                                   | Outcome               |                                                              |                                                  |       |
|---------------------|------------------------------------------|-------------------------------------|---------------------------|----------------------------------------|----------------------------|-----------------------------------|-----------------------|--------------------------------------------------------------|--------------------------------------------------|-------|
| First author/Year   | Representativeness of the Exposed Cohort | Selection of the Non-Exposed Cohort | Ascertainment of Exposure | Outcome Was Not Present at Study Start | Comparability: Age and Sex | Comparability: Additional Factors | Assessment of Outcome | Was Follow-Up Long Enough for Outcomes to Occur? (>=3 month) | Adequacy of Follow -up of Cohorts (dropout <20%) | Total |
| Gopinath/2010[72]   |                                          | ★                                   | ★                         | ★                                      | ★                          |                                   | ★                     |                                                              | ★                                                | 6     |
| Curhan/2014[73]     |                                          | ★                                   | ★                         | ★                                      |                            |                                   | ★                     |                                                              | ★                                                | 5     |
| Rosenhall/2015[58]  | ★                                        |                                     | ★                         | ★                                      | ★                          |                                   | ★                     |                                                              | ★                                                | 5     |
| Kim/2015[75]        | ★                                        |                                     | ★                         | ★                                      | ★                          | ★                                 | ★                     | ★                                                            | ★                                                | 8     |
| Dawes/2020[63]      | ★                                        |                                     | ★                         | ★                                      | ★                          | ★                                 | ★                     | ★                                                            | ★                                                | 8     |
| Gopinath/2011[52]   | ★                                        |                                     | ★                         | ★                                      |                            |                                   | ★                     | ★                                                            | ★                                                | 6     |
| Gopinath/2010[61]   | ★                                        |                                     | ★                         | ★                                      |                            | ★                                 | ★                     | ★                                                            | ★                                                | 7     |
| Sardone/2020[50]    | ★                                        |                                     | ★                         | ★                                      |                            | ★                                 | ★                     | ★                                                            | ★                                                | 7     |
| Lampignano/2021[93] |                                          |                                     | ★                         | ★                                      |                            | ★                                 | ★                     | ★                                                            | ★                                                | 6     |
| Tang/2021[101]      | ★                                        |                                     | ★                         | ★                                      |                            |                                   | ★                     | ★                                                            | ★                                                | 6     |
| Durga/2007[124]     | ★                                        | ★                                   | ★                         | ★                                      | ★                          |                                   | ★                     | ★                                                            | ★                                                | 8     |
| Gopinath/2011[135]  | ★                                        |                                     | ★                         | ★                                      |                            | ★                                 | ★                     |                                                              | ★                                                | 6     |
| Kang/2014[126]      | ★                                        |                                     | ★                         | ★                                      | ★                          | ★                                 | ★                     |                                                              | ★                                                | 7     |
| Lee/2018[145]       | ★                                        |                                     | ★                         | ★                                      |                            |                                   | ★                     |                                                              | ★                                                | 5     |

**Table S2.** Newcastle-Ottawa Scale Quality Assessment of included studies of the effects of lifestyles on ARHL, ARVL and related components.

| First author/Year           | Selection                                |                                     |                           |                                        | Comparability              |                                   | Outcome               |                                                              |                                                  | Total |
|-----------------------------|------------------------------------------|-------------------------------------|---------------------------|----------------------------------------|----------------------------|-----------------------------------|-----------------------|--------------------------------------------------------------|--------------------------------------------------|-------|
|                             | Representativeness of the Exposed Cohort | Selection of the Non-Exposed Cohort | Ascertainment of Exposure | Outcome Was Not Present at Study Start | Comparability: Age and Sex | Comparability: Additional Factors | Assessment of Outcome | Was Follow-Up Long Enough for Outcomes to Occur? (>=3 month) | Adequacy of Follow -up of Cohorts (dropout <20%) |       |
| Kawakami/2021[151]          | ★                                        |                                     |                           | ★                                      |                            |                                   | ★                     | ★                                                            | ★                                                | 5     |
| Martines/2016[166]          | ★                                        |                                     |                           | ★                                      |                            |                                   | ★                     |                                                              | ★                                                | 4     |
| Ekin/2016[168]              |                                          | ★                                   | ★                         | ★                                      |                            |                                   | ★                     |                                                              | ★                                                | 5     |
| Jiang/2021[164]             | ★                                        |                                     |                           | ★                                      |                            |                                   | ★                     |                                                              | ★                                                | 4     |
| Itoh/2001[174]              |                                          | ★                                   | ★                         |                                        |                            | ★                                 |                       |                                                              | ★                                                | 4     |
| Ferrite & Santana/2005[173] |                                          |                                     | ★                         |                                        |                            | ★                                 | ★                     |                                                              | ★                                                | 4     |
| Pouryaghoub/2007[172]       |                                          |                                     | ★                         |                                        |                            | ★                                 | ★                     |                                                              | ★                                                | 4     |
| Gopinath/2010[178]          | ★                                        |                                     | ★                         | ★                                      |                            | ★                                 | ★                     |                                                              | ★                                                | 6     |
| Wada/2017[175]              |                                          | ★                                   | ★                         |                                        |                            |                                   | ★                     |                                                              | ★                                                | 4     |
| Gopinath/2021[181]          | ★                                        |                                     | ★                         | ★                                      |                            | ★                                 | ★                     |                                                              | ★                                                | 6     |
